# Supplementary material for: Measurement report: Brown carbon aerosol in rural Germany – sources, chemistry, and diurnal variations
Source: Copernicus journal article supplement (doi:10.5194/acp-25-1917-2025), 2025-02-12
Supplement: Supplementary file 1 [file acp-25-1917-2025-supplement.pdf]

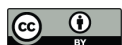

*Supplement of*

## **Measurement report: Brown carbon aerosol in rural Germany – sources, chemistry, and diurnal variations**

**Feng Jiang et al.**

*Correspondence to:* Feng Jiang (feng.jiang@kit.edu) and Harald Saathoff (harald.saathoff@kit.edu)

The copyright of individual parts of the supplement might differ from the article licence.

## 1. Nitroaromatic compounds and levoglucosan calibration

The calibration of 4-nitrophenol, 4-nitrocatechol, 2-methyl-4-nitrophenol, and 4-methyl-5-nitrocatechol was utilized to characterize the sensitivity of nitro aromatic compounds (NACs). Each NACs was dissolved into methanol to about  $10 \text{ ng } \mu\text{L}^{-1}$  as a standard NACs solution. Different volume (1, 2, 5, and  $10 \text{ } \mu\text{L}$ ) of the standard NACs solution was deposited on a PTFE filter using an accurate syringe. The deposited filter was heated by FIGAERO-iodide-CIMS with ultra-high purity nitrogen following a thermal desorption. The filters were then desorbed in the same way as for the field samples. Every volume of the standard solution was repeated three times. The sensitivities of our iodide CIMS for 4-nitrophenol, 4-nitrocatechol, 2-methyl-4-nitrophenol, and 4-methyl-5-nitrocatechol were  $18 \pm 10 \text{ cps ppt}^{-1}$ ,  $11 \pm 7 \text{ cps ppt}^{-1}$ ,  $21 \pm 11 \text{ cps ppt}^{-1}$ , and  $21 \pm 14 \text{ cps ppt}^{-1}$ , respectively (Figure S9). The slopes in Figure S9 are the ratios of measured concentrations by FIGAERO-CIMS from the calibration vs “standard concentrations”, where measured concentrations were calculated using a nominal maximum sensitivity of  $22 \text{ cps ppt}^{-1}$  (Salvador et al., 2021). The average sensitivity of all four NACs was  $18 \pm 12 \text{ cps ppt}^{-1}$ . We used this average sensitivity factor to estimate the concentrations of other potential brown carbon molecules in this study.

We calibrated our FIGAERO-CIMS with the important biomass burning tracer levoglucosan. The calibration method was same as NACs calibration. The sensitivity of levoglucosan was determined  $9 \pm 3 \text{ cps ppt}^{-1}$  (Figure S10). We used the sensitivity of  $9 \pm 3 \text{ cps ppt}^{-1}$  to estimate the concentrations of molecules, which are not identified as potential BrC molecules.

Table S1. Instruments installed in the measurement building number 322 at KIT Campus Nord during the campaign from February 17<sup>th</sup> – March 16<sup>th</sup>, 2021.

| <b>Measured parameter</b>                                                             | <b>Instrument</b>                     |
|---------------------------------------------------------------------------------------|---------------------------------------|
| Ambient temperature                                                                   | WS700 (Lufft GmbH)                    |
| Container temperature                                                                 | WS700 (Lufft GmbH)                    |
| Relative humidity                                                                     | WS700 (Lufft GmbH)                    |
| Pressure                                                                              | WS700 (Lufft GmbH)                    |
| Wind speed                                                                            | WS700 (Lufft GmbH)                    |
| Wind direction                                                                        | WS700 (Lufft GmbH)                    |
| Precipitation                                                                         | WS700 (Lufft GmbH)                    |
| Global radiation                                                                      | WS700 (Lufft GmbH)                    |
| O <sub>3</sub>                                                                        | O341M (Environment SA)                |
| NO <sub>2</sub>                                                                       | AS32M (Environment SA)                |
| Particle optical diameter (0.18-18 µm)                                                | OPC FIDAS200 (Palas GmbH)             |
| Black carbon (BC)                                                                     | AE51 Aethalometer (Aethlabs Inc.)     |
| Black carbon (BC)                                                                     | MA200 Aethalometer (Aethlabs Inc.)    |
| Black carbon (BC) and brown carbon (BrC)                                              | AE33 Aethalometer (Magee Inc.)        |
| Particle-phase oxygenated organic molecules (intermittent online analysis of filters) | FIGAERO-CIMS (Aerodyne Research Inc.) |
| Gas phase oxygenated organic molecules (online)                                       | CIMS (Aerodyne Research Inc.)         |
| VOCs/semi-volatile particles                                                          | CHARON-PTR-MS (IONCON Analytik GmbH)  |
| Profiles of aerosol and/or cloud backscatter                                          | LIDAR (Raymetrics Inc.)               |
| Particle number                                                                       | CPC 3789 (TSI Inc.)                   |
| Particle size (10-410 nm)                                                             | Nanoscan (TSI Inc.)                   |



Table S2. Assignment of 171 potential brown carbon molecules and 7 nitro aromatic compounds (red marks) in the particle phase detected at KIT Campus Nord, including mass, formula, double bond equivalent (DBE), the ratio of O/C, the ratio of H/C, value of C\*0.9 and C\*0.5, average concentrations, and standard variation.

| Number | Mass<br>(g mol <sup>-1</sup> ) | Formula  | DBE | O/C | H/C | C*0.9 | C*0.5 | Average<br>(ng m <sup>-3</sup> ) | Std<br>(ng m <sup>-3</sup> ) |
|--------|--------------------------------|----------|-----|-----|-----|-------|-------|----------------------------------|------------------------------|
| 1      | 75                             | C2H4O3   | 1.5 | 1.5 | 1.5 | 1.8   | 1     | 0.04                             | 0.02                         |
| 2      | 104                            | C3H4O4   | 2   | 1.3 | 1.3 | 2.7   | 1.5   | 0.82                             | 0.85                         |
| 3      | 120                            | C3H4O5   | 2   | 1.7 | 1.3 | 2.7   | 1.5   | 0.32                             | 0.30                         |
| 4      | 152                            | C3H4O7   | 2   | 2.3 | 1.3 | 2.7   | 1.5   | 0.10                             | 0.05                         |
| 5      | 168                            | C3H4O8   | 2   | 2.7 | 1.3 | 2.7   | 1.5   | 0.12                             | 0.05                         |
| 6      | 103                            | C3H5O3N1 | 2   | 1.0 | 1.7 | 2.7   | 1.5   | 0.08                             | 0.03                         |
| 7      | 135                            | C3H5O5N1 | 2   | 1.7 | 1.7 | 2.7   | 1.5   | 0.17                             | 0.13                         |
| 8      | 151                            | C3H5O6N1 | 2   | 2.0 | 1.7 | 2.7   | 1.5   | 0.16                             | 0.12                         |
| 9      | 167                            | C3H5O7N1 | 2   | 2.3 | 1.7 | 2.7   | 1.5   | 0.11                             | 0.11                         |
| 10     | 183                            | C3H5O8N1 | 2   | 2.7 | 1.7 | 2.7   | 1.5   | 0.25                             | 0.17                         |
| 11     | 84                             | C4H4O2   | 3   | 0.5 | 1.0 | 3.6   | 2     | 0.04                             | 0.02                         |
| 12     | 116                            | C4H4O4   | 3   | 1.0 | 1.0 | 3.6   | 2     | 0.50                             | 0.37                         |
| 13     | 132                            | C4H4O5   | 3   | 1.3 | 1.0 | 3.6   | 2     | 0.43                             | 0.33                         |
| 14     | 148                            | C4H4O6   | 3   | 1.5 | 1.0 | 3.6   | 2     | 0.96                             | 0.94                         |
| 15     | 164                            | C4H4O7   | 3   | 1.8 | 1.0 | 3.6   | 2     | 0.56                             | 0.27                         |
| 16     | 179                            | C4H4O7N1 | 3   | 1.8 | 1.3 | 3.6   | 2     | 0.46                             | 0.11                         |
| 17     | 180                            | C4H4O8   | 3   | 2.0 | 1.0 | 3.6   | 2     | 0.99                             | 0.74                         |
| 18     | 99                             | C4H5O2N1 | 3   | 0.5 | 1.3 | 3.6   | 2     | 0.06                             | 0.02                         |
| 19     | 131                            | C4H5O4N1 | 3   | 1.0 | 1.3 | 3.6   | 2     | 0.11                             | 0.06                         |
| 20     | 147                            | C4H5O5N1 | 3   | 1.3 | 1.3 | 3.6   | 2     | 0.14                             | 0.09                         |
| 21     | 163                            | C4H5O6N1 | 3   | 1.5 | 1.3 | 3.6   | 2     | 0.12                             | 0.07                         |
| 22     | 179                            | C4H5O7N1 | 3   | 1.8 | 1.3 | 3.6   | 2     | 0.31                             | 0.18                         |
| 23     | 112                            | C5H4O3   | 4   | 0.6 | 0.8 | 4.5   | 2.5   | 0.46                             | 0.20                         |
| 24     | 192                            | C5H4O8   | 4   | 1.6 | 0.8 | 4.5   | 2.5   | 0.13                             | 0.06                         |
| 25     | 80                             | C5H4O1   | 4   | 0.2 | 0.8 | 4.5   | 2.5   | 0.15                             | 0.10                         |
| 26     | 112                            | C5H4O3   | 4   | 0.6 | 0.8 | 4.5   | 2.5   | 0.07                             | 0.05                         |
| 27     | 128                            | C5H4O4   | 4   | 0.8 | 0.8 | 4.5   | 2.5   | 0.31                             | 0.20                         |
| 28     | 144                            | C5H4O5   | 4   | 1.0 | 0.8 | 4.5   | 2.5   | 0.62                             | 0.44                         |
| 29     | 175                            | C5H4O6N1 | 4   | 1.2 | 1.0 | 4.5   | 2.5   | 0.17                             | 0.08                         |
| 30     | 176                            | C5H4O7   | 4   | 1.4 | 0.8 | 4.5   | 2.5   | 0.05                             | 0.04                         |
| 31     | 192                            | C5H4O8   | 4   | 1.6 | 0.8 | 4.5   | 2.5   | 0.24                             | 0.12                         |
| 32     | 82                             | C5H6O1   | 3   | 0.2 | 1.2 | 4.5   | 2.5   | 0.07                             | 0.02                         |
| 33     | 98                             | C5H6O2   | 3   | 0.4 | 1.2 | 4.5   | 2.5   | 0.02                             | 0.02                         |
| 34     | 127                            | C5H5O3N1 | 4   | 0.6 | 1.0 | 4.5   | 2.5   | 0.06                             | 0.04                         |
| 35     | 114                            | C5H6O3   | 3   | 0.6 | 1.2 | 4.5   | 2.5   | 0.18                             | 0.06                         |
| 36     | 143                            | C5H5O4N1 | 4   | 0.8 | 1.0 | 4.5   | 2.5   | 0.25                             | 0.16                         |

|    |     |          |   |     |     |     |     |       |       |
|----|-----|----------|---|-----|-----|-----|-----|-------|-------|
| 37 | 159 | C5H5O5N1 | 4 | 1.0 | 1.0 | 4.5 | 2.5 | 0.23  | 0.15  |
| 38 | 175 | C5H5O6N1 | 4 | 1.2 | 1.0 | 4.5 | 2.5 | 0.16  | 0.08  |
| 39 | 178 | C5H6O7   | 3 | 1.4 | 1.2 | 4.5 | 2.5 | 0.19  | 0.08  |
| 40 | 207 | C5H5O8N1 | 4 | 1.6 | 1.0 | 4.5 | 2.5 | 0.21  | 0.12  |
| 41 | 194 | C5H6O8   | 3 | 1.6 | 1.2 | 4.5 | 2.5 | 0.18  | 0.08  |
| 42 | 114 | C5H6O3   | 3 | 0.6 | 1.2 | 4.5 | 2.5 | 0.09  | 0.05  |
| 43 | 130 | C5H6O4   | 3 | 0.8 | 1.2 | 4.5 | 2.5 | 0.76  | 0.68  |
| 44 | 146 | C5H6O5   | 3 | 1.0 | 1.2 | 4.5 | 2.5 | 1.50  | 1.05  |
| 45 | 162 | C5H6O6   | 3 | 1.2 | 1.2 | 4.5 | 2.5 | 0.24  | 0.38  |
| 46 | 178 | C5H6O7   | 3 | 1.4 | 1.2 | 4.5 | 2.5 | 0.35  | 0.15  |
| 47 | 193 | C5H6O7N1 | 3 | 1.4 | 1.4 | 4.5 | 2.5 | 0.15  | 0.05  |
| 48 | 194 | C5H6O8   | 3 | 1.6 | 1.2 | 4.5 | 2.5 | 0.26  | 0.14  |
| 49 | 209 | C5H6O8N1 | 3 | 1.6 | 1.4 | 4.5 | 2.5 | 0.37  | 0.16  |
| 50 | 129 | C5H7O3N1 | 3 | 0.6 | 1.4 | 4.5 | 2.5 | 0.21  | 0.12  |
| 51 | 145 | C5H7O4N1 | 3 | 0.8 | 1.4 | 4.5 | 2.5 | 0.20  | 0.15  |
| 52 | 161 | C5H7O5N1 | 3 | 1.0 | 1.4 | 4.5 | 2.5 | 0.19  | 0.16  |
| 53 | 177 | C5H7O6N1 | 3 | 1.2 | 1.4 | 4.5 | 2.5 | 0.37  | 0.27  |
| 54 | 193 | C5H7O7N1 | 3 | 1.4 | 1.4 | 4.5 | 2.5 | 1.47  | 1.16  |
| 55 | 209 | C5H7O8N1 | 3 | 1.6 | 1.4 | 4.5 | 2.5 | 0.30  | 0.22  |
| 56 | 225 | C5H7O9N1 | 3 | 1.8 | 1.4 | 4.5 | 2.5 | 0.13  | 0.05  |
| 57 | 236 | C6H4O10  | 5 | 1.7 | 0.7 | 5.4 | 3   | 0.18  | 0.06  |
| 58 | 140 | C6H4O4   | 5 | 0.7 | 0.7 | 5.4 | 3   | 0.23  | 0.18  |
| 59 | 156 | C6H4O5   | 5 | 0.8 | 0.7 | 5.4 | 3   | 0.29  | 0.17  |
| 60 | 171 | C6H4O5N1 | 5 | 0.8 | 0.8 | 5.4 | 3   | 0.19  | 0.10  |
| 61 | 188 | C6H4O7   | 5 | 1.2 | 0.7 | 5.4 | 3   | 0.13  | 0.08  |
| 62 | 220 | C6H4O9   | 5 | 1.5 | 0.7 | 5.4 | 3   | 0.10  | 0.04  |
| 63 | 91  | C6H5N1   | 5 | 0.0 | 0.8 | 5.4 | 3   | 0.04  | 0.02  |
| 64 | 139 | C6H5O3N1 | 5 | 0.5 | 0.8 | 5.4 | 3   | 0.77  | 0.50  |
| 65 | 155 | C6H5O4N1 | 5 | 0.7 | 0.8 | 5.4 | 3   | 10.81 | 11.47 |
| 66 | 171 | C6H5O5N1 | 5 | 0.8 | 0.8 | 5.4 | 3   | 0.52  | 0.59  |
| 67 | 187 | C6H5O6N1 | 5 | 1.0 | 0.8 | 5.4 | 3   | 0.12  | 0.04  |
| 68 | 203 | C6H5O7N1 | 5 | 1.2 | 0.8 | 5.4 | 3   | 0.09  | 0.03  |
| 69 | 190 | C6H5O7   | 4 | 1.2 | 1.0 | 5.4 | 3   | 0.15  | 0.08  |
| 70 | 206 | C6H5O8   | 4 | 1.3 | 1.0 | 5.4 | 3   | 0.19  | 0.08  |
| 71 | 222 | C6H5O9   | 4 | 1.5 | 1.0 | 5.4 | 3   | 0.14  | 0.06  |
| 72 | 126 | C6H6O3   | 4 | 0.5 | 1.0 | 5.4 | 3   | 0.08  | 0.05  |
| 73 | 142 | C6H6O4   | 4 | 0.7 | 1.0 | 5.4 | 3   | 0.22  | 0.15  |
| 74 | 157 | C6H6O4N1 | 4 | 0.7 | 1.2 | 5.4 | 3   | 0.28  | 0.11  |
| 75 | 158 | C6H6O5   | 4 | 0.8 | 1.0 | 5.4 | 3   | 1.70  | 1.19  |
| 76 | 174 | C6H6O6   | 4 | 1.0 | 1.0 | 5.4 | 3   | 0.55  | 0.42  |
| 77 | 206 | C6H6O8   | 4 | 1.3 | 1.0 | 5.4 | 3   | 0.51  | 0.27  |

|     |     |           |   |     |     |     |     |      |      |
|-----|-----|-----------|---|-----|-----|-----|-----|------|------|
| 78  | 238 | C6H6O10   | 4 | 1.7 | 1.0 | 5.4 | 3   | 0.10 | 0.03 |
| 79  | 141 | C6H7O3N1  | 4 | 0.5 | 1.2 | 5.4 | 3   | 0.13 | 0.06 |
| 80  | 157 | C6H7O4N1  | 4 | 0.7 | 1.2 | 5.4 | 3   | 0.27 | 0.21 |
| 81  | 173 | C6H7O5N1  | 4 | 0.8 | 1.2 | 5.4 | 3   | 0.32 | 0.20 |
| 82  | 189 | C6H7O6N1  | 4 | 1.0 | 1.2 | 5.4 | 3   | 0.31 | 0.20 |
| 83  | 205 | C6H7O7N1  | 4 | 1.2 | 1.2 | 5.4 | 3   | 0.27 | 0.15 |
| 84  | 221 | C6H7O8N1  | 4 | 1.3 | 1.2 | 5.4 | 3   | 0.13 | 0.06 |
| 85  | 200 | C7H4O7    | 6 | 1.0 | 0.6 | 6.3 | 3.5 | 0.06 | 0.04 |
| 86  | 154 | C7H6O4    | 5 | 0.6 | 0.9 | 6.3 | 3.5 | 0.35 | 0.30 |
| 87  | 170 | C7H6O5    | 5 | 0.7 | 0.9 | 6.3 | 3.5 | 0.41 | 0.27 |
| 88  | 218 | C7H6O8    | 5 | 1.1 | 0.9 | 6.3 | 3.5 | 0.21 | 0.11 |
| 89  | 233 | C7H6O8N1  | 5 | 1.1 | 1.0 | 6.3 | 3.5 | 0.21 | 0.07 |
| 90  | 153 | C7H7O3N1  | 5 | 0.4 | 1.0 | 6.3 | 3.5 | 0.31 | 0.19 |
| 91  | 169 | C7H7O4N1  | 5 | 0.6 | 1.0 | 6.3 | 3.5 | 3.29 | 4.00 |
| 92  | 156 | C7H7O4    | 4 | 0.6 | 1.1 | 6.3 | 3.5 | 0.44 | 0.19 |
| 93  | 185 | C7H7O5N1  | 5 | 0.7 | 1.0 | 6.3 | 3.5 | 1.25 | 1.30 |
| 94  | 172 | C7H7O5    | 4 | 0.7 | 1.1 | 6.3 | 3.5 | 0.28 | 0.12 |
| 95  | 201 | C7H7O6N1  | 5 | 0.9 | 1.0 | 6.3 | 3.5 | 0.31 | 0.16 |
| 96  | 188 | C7H7O6    | 4 | 0.9 | 1.1 | 6.3 | 3.5 | 0.26 | 0.17 |
| 97  | 217 | C7H7O7N1  | 5 | 1.0 | 1.0 | 6.3 | 3.5 | 0.30 | 0.17 |
| 98  | 204 | C7H7O7    | 4 | 1.0 | 1.1 | 6.3 | 3.5 | 0.18 | 0.07 |
| 99  | 233 | C7H7O8N1  | 5 | 1.1 | 1.0 | 6.3 | 3.5 | 0.07 | 0.05 |
| 100 | 220 | C7H7O8    | 4 | 1.1 | 1.1 | 6.3 | 3.5 | 0.19 | 0.08 |
| 101 | 140 | C7H8O3    | 4 | 0.4 | 1.1 | 6.3 | 3.5 | 0.13 | 0.12 |
| 102 | 156 | C7H8O4    | 4 | 0.6 | 1.1 | 6.3 | 3.5 | 0.39 | 0.28 |
| 103 | 172 | C7H8O5    | 4 | 0.7 | 1.1 | 6.3 | 3.5 | 2.37 | 1.69 |
| 104 | 188 | C7H8O6    | 4 | 0.9 | 1.1 | 6.3 | 3.5 | 0.93 | 0.52 |
| 105 | 204 | C7H8O7    | 4 | 1.0 | 1.1 | 6.3 | 3.5 | 0.46 | 0.26 |
| 106 | 220 | C7H8O8    | 4 | 1.1 | 1.1 | 6.3 | 3.5 | 0.31 | 0.20 |
| 107 | 236 | C7H8O9    | 4 | 1.3 | 1.1 | 6.3 | 3.5 | 0.31 | 0.17 |
| 108 | 251 | C7H8O9N1  | 4 | 1.3 | 1.3 | 6.3 | 3.5 | 0.09 | 0.03 |
| 109 | 155 | C7H9O3N1  | 4 | 0.4 | 1.3 | 6.3 | 3.5 | 0.53 | 0.47 |
| 110 | 171 | C7H9O4N1  | 4 | 0.6 | 1.3 | 6.3 | 3.5 | 0.30 | 0.21 |
| 111 | 187 | C7H9O5N1  | 4 | 0.7 | 1.3 | 6.3 | 3.5 | 0.32 | 0.24 |
| 112 | 203 | C7H9O6N1  | 4 | 0.9 | 1.3 | 6.3 | 3.5 | 0.66 | 0.58 |
| 113 | 219 | C7H9O7N1  | 4 | 1.0 | 1.3 | 6.3 | 3.5 | 1.12 | 0.83 |
| 114 | 235 | C7H9O8N1  | 4 | 1.1 | 1.3 | 6.3 | 3.5 | 0.36 | 0.22 |
| 115 | 251 | C7H9O9N1  | 4 | 1.3 | 1.3 | 6.3 | 3.5 | 0.27 | 0.11 |
| 116 | 267 | C7H9O10N1 | 4 | 1.4 | 1.3 | 6.3 | 3.5 | 0.18 | 0.06 |
| 117 | 182 | C8H6O5    | 6 | 0.6 | 0.8 | 7.2 | 4   | 0.14 | 0.09 |
| 118 | 213 | C8H7O6N1  | 6 | 0.8 | 0.9 | 7.2 | 4   | 0.32 | 0.18 |

|     |     |             |   |     |     |     |     |      |      |
|-----|-----|-------------|---|-----|-----|-----|-----|------|------|
| 119 | 200 | C8H8O6      | 5 | 0.8 | 1.0 | 7.2 | 4   | 0.08 | 0.08 |
| 120 | 229 | C8H7O7N1    | 6 | 0.9 | 0.9 | 7.2 | 4   | 0.23 | 0.10 |
| 121 | 216 | C8H8O7      | 5 | 0.9 | 1.0 | 7.2 | 4   | 0.10 | 0.05 |
| 122 | 168 | C8H8O4      | 5 | 0.5 | 1.0 | 7.2 | 4   | 0.20 | 0.14 |
| 123 | 184 | C8H8O5      | 5 | 0.6 | 1.0 | 7.2 | 4   | 0.79 | 0.46 |
| 124 | 200 | C8H8O6      | 5 | 0.8 | 1.0 | 7.2 | 4   | 0.78 | 0.42 |
| 125 | 216 | C8H8O7      | 5 | 0.9 | 1.0 | 7.2 | 4   | 0.55 | 0.28 |
| 126 | 231 | C8H8O7N1    | 5 | 0.9 | 1.1 | 7.2 | 4   | 0.15 | 0.05 |
| 127 | 183 | C8H9O4N1    | 5 | 0.5 | 1.1 | 7.2 | 4   | 1.65 | 2.08 |
| 128 | 199 | C8H9O5N1    | 5 | 0.6 | 1.1 | 7.2 | 4   | 0.51 | 0.37 |
| 129 | 215 | C8H9O6N1    | 5 | 0.8 | 1.1 | 7.2 | 4   | 0.45 | 0.26 |
| 130 | 231 | C8H9O7N1    | 5 | 0.9 | 1.1 | 7.2 | 4   | 0.39 | 0.21 |
| 131 | 295 | C8H9O11N1   | 5 | 1.4 | 1.1 | 7.2 | 4   | 0.14 | 0.04 |
| 132 | 228 | C9H8O7      | 6 | 0.8 | 0.9 | 8.1 | 4.5 | 0.49 | 0.19 |
| 133 | 211 | C9H9O5N1    | 6 | 0.6 | 1.0 | 8.1 | 4.5 | 0.45 | 0.45 |
| 134 | 230 | C9H10O7     | 5 | 0.8 | 1.1 | 8.1 | 4.5 | 0.32 | 0.24 |
| 135 | 259 | C9H9O8N1    | 6 | 0.9 | 1.0 | 8.1 | 4.5 | 0.27 | 0.10 |
| 136 | 307 | C9H9O11N1   | 6 | 1.2 | 1.0 | 8.1 | 4.5 | 0.13 | 0.04 |
| 137 | 182 | C9H10O4     | 5 | 0.4 | 1.1 | 8.1 | 4.5 | 0.26 | 0.19 |
| 138 | 198 | C9H10O5     | 5 | 0.6 | 1.1 | 8.1 | 4.5 | 0.52 | 0.38 |
| 139 | 214 | C9H10O6     | 5 | 0.7 | 1.1 | 8.1 | 4.5 | 1.53 | 0.89 |
| 140 | 230 | C9H10O7     | 5 | 0.8 | 1.1 | 8.1 | 4.5 | 0.59 | 0.32 |
| 141 | 262 | C9H10O9     | 5 | 1.0 | 1.1 | 8.1 | 4.5 | 0.24 | 0.13 |
| 142 | 213 | C9H11O5N1   | 5 | 0.6 | 1.2 | 8.1 | 4.5 | 0.48 | 0.34 |
| 143 | 229 | C9H11O6N1   | 5 | 0.7 | 1.2 | 8.1 | 4.5 | 0.47 | 0.37 |
| 144 | 293 | C9H11O10N1  | 5 | 1.1 | 1.2 | 8.1 | 4.5 | 0.24 | 0.09 |
| 145 | 309 | C9H11O11N1  | 5 | 1.2 | 1.2 | 8.1 | 4.5 | 0.18 | 0.06 |
| 146 | 242 | C10H10O7    | 6 | 0.7 | 1.0 | 9   | 5   | 0.82 | 0.43 |
| 147 | 257 | C10H11O7N1  | 6 | 0.7 | 1.1 | 9   | 5   | 0.56 | 0.31 |
| 148 | 273 | C10H11O8N1  | 6 | 0.8 | 1.1 | 9   | 5   | 0.36 | 0.19 |
| 149 | 305 | C10H11O10N1 | 6 | 1.0 | 1.1 | 9   | 5   | 0.22 | 0.09 |
| 150 | 353 | C10H11O13N1 | 6 | 1.3 | 1.1 | 9   | 5   | 0.19 | 0.07 |
| 151 | 282 | C11H6O9     | 9 | 0.8 | 0.5 | 9.9 | 5.5 | 0.37 | 0.15 |
| 152 | 284 | C11H8O9     | 8 | 0.8 | 0.7 | 9.9 | 5.5 | 0.50 | 0.23 |
| 153 | 347 | C11H9O12N1  | 8 | 1.1 | 0.8 | 9.9 | 5.5 | 0.16 | 0.04 |
| 154 | 286 | C11H10O9    | 7 | 0.8 | 0.9 | 9.9 | 5.5 | 0.58 | 0.27 |
| 155 | 285 | C11H11O8N1  | 7 | 0.7 | 1.0 | 9.9 | 5.5 | 0.30 | 0.15 |
| 156 | 301 | C11H11O9N1  | 7 | 0.8 | 1.0 | 9.9 | 5.5 | 0.21 | 0.08 |
| 157 | 349 | C11H11O12N1 | 7 | 1.1 | 1.0 | 9.9 | 5.5 | 0.25 | 0.09 |
| 158 | 256 | C11H12O7    | 6 | 0.6 | 1.1 | 9.9 | 5.5 | 0.82 | 0.56 |
| 159 | 272 | C11H12O8    | 6 | 0.7 | 1.1 | 9.9 | 5.5 | 0.85 | 0.44 |



|     |     |             |   |     |     |      |     |      |      |
|-----|-----|-------------|---|-----|-----|------|-----|------|------|
| 160 | 288 | C11H12O9    | 6 | 0.8 | 1.1 | 9.9  | 5.5 | 0.16 | 0.08 |
| 161 | 287 | C11H13O8N1  | 6 | 0.7 | 1.2 | 9.9  | 5.5 | 0.41 | 0.22 |
| 162 | 303 | C11H13O9N1  | 6 | 0.8 | 1.2 | 9.9  | 5.5 | 0.35 | 0.18 |
| 163 | 319 | C11H13O10N1 | 6 | 0.9 | 1.2 | 9.9  | 5.5 | 0.25 | 0.12 |
| 164 | 300 | C12H12O9    | 7 | 0.8 | 1.0 | 10.8 | 6   | 0.94 | 0.49 |
| 165 | 332 | C12H12O11   | 7 | 0.9 | 1.0 | 10.8 | 6   | 0.68 | 0.27 |
| 166 | 348 | C12H12O12   | 7 | 1.0 | 1.0 | 10.8 | 6   | 0.64 | 0.24 |
| 167 | 282 | C13H14O7    | 7 | 0.5 | 1.1 | 11.7 | 6.5 | 0.48 | 0.32 |
| 168 | 330 | C13H14O10   | 7 | 0.8 | 1.1 | 11.7 | 6.5 | 0.83 | 0.34 |
| 169 | 394 | C13H14O14   | 7 | 1.1 | 1.1 | 11.7 | 6.5 | 0.36 | 0.11 |
| 170 | 345 | C13H15O10N1 | 7 | 0.8 | 1.2 | 11.7 | 6.5 | 0.38 | 0.19 |
| 171 | 393 | C13H15O13N1 | 7 | 1.0 | 1.2 | 11.7 | 6.5 | 0.20 | 0.07 |
| 172 | 326 | C14H14O9    | 8 | 0.6 | 1.0 | 12.6 | 7   | 0.12 | 0.11 |
| 173 | 324 | C15H16O8    | 8 | 0.5 | 1.1 | 13.5 | 7.5 | 1.39 | 1.15 |
| 174 | 356 | C15H16O10   | 8 | 0.7 | 1.1 | 13.5 | 7.5 | 1.62 | 0.57 |
| 175 | 372 | C15H16O11   | 8 | 0.7 | 1.1 | 13.5 | 7.5 | 1.01 | 0.37 |
| 176 | 403 | C15H17O12N1 | 8 | 0.8 | 1.1 | 13.5 | 7.5 | 0.24 | 0.10 |
| 177 | 368 | C16H16O10   | 9 | 0.6 | 1.0 | 14.4 | 8   | 0.97 | 0.37 |
| 178 | 366 | C17H18O9    | 9 | 0.5 | 1.1 | 15.3 | 8.5 | 0.24 | 0.17 |

---

Table S3. Assignment of 27 potential brown carbon molecules and 4 nitro aromatic compounds (red marks) in the gas phase detected at KIT Campus Nord, including mass, formula, double bond equivalent (DBE), the ratio of O/C, and the ratio of H/C.

| Number | Mass<br>(g mol <sup>-1</sup> ) | Formula  | DBE | O/C | H/C | C*0.9 | C*0.5 | Average<br>(ng m <sup>-3</sup> ) | Std<br>(ng m <sup>-3</sup> ) |
|--------|--------------------------------|----------|-----|-----|-----|-------|-------|----------------------------------|------------------------------|
| 1      | 136                            | C3H4O6   | 2   | 2.0 | 1.3 | 2.7   | 1.5   | 0.95                             | 0.13                         |
| 2      | 151                            | C3H5O6N1 | 2   | 2.0 | 1.7 | 2.7   | 1.5   | 0.05                             | 0.52                         |
| 3      | 84                             | C4H4O2   | 3   | 0.5 | 1.0 | 3.6   | 2     | 0.39                             | 0.52                         |
| 4      | 196                            | C4H4O9   | 3   | 2.3 | 1.0 | 3.6   | 2     | 0.67                             | 0.28                         |
| 5      | 163                            | C4H5O6N1 | 3   | 1.5 | 1.3 | 3.6   | 2     | 0.21                             | 0.62                         |
| 6      | 179                            | C4H5O7N1 | 3   | 1.8 | 1.3 | 3.6   | 2     | 0.46                             | 0.08                         |
| 7      | 208                            | C5H4O9   | 4   | 1.8 | 0.8 | 4.5   | 2.5   | 0.12                             | 0.10                         |
| 8      | 175                            | C5H5O6N1 | 4   | 1.2 | 1.0 | 4.5   | 2.5   | 0.13                             | 0.09                         |
| 9      | 191                            | C5H5O7N1 | 4   | 1.4 | 1.0 | 4.5   | 2.5   | 0.04                             | 0.06                         |
| 10     | 207                            | C5H5O8N1 | 4   | 1.6 | 1.0 | 4.5   | 2.5   | 0.02                             | 0.08                         |
| 11     | 130                            | C5H6O4   | 3   | 0.8 | 1.2 | 4.5   | 2.5   | 0.02                             | 0.47                         |
| 12     | 210                            | C5H6O9   | 3   | 1.8 | 1.2 | 4.5   | 2.5   | 0.51                             | 1.34                         |
| 13     | 177                            | C5H7O6N1 | 3   | 1.2 | 1.4 | 4.5   | 2.5   | 1.16                             | 0.27                         |
| 14     | 193                            | C5H7O7N1 | 3   | 1.4 | 1.4 | 4.5   | 2.5   | 0.24                             | 0.32                         |
| 15     | 139                            | C6H5O3N1 | 5   | 0.5 | 0.8 | 5.4   | 3     | 0.34                             | 0.32                         |
| 16     | 155                            | C6H5O4N1 | 5   | 0.7 | 0.8 | 5.4   | 3     | 1.16                             | 1.04                         |
| 17     | 158                            | C6H6O5   | 4   | 0.8 | 1.0 | 5.4   | 3     | 0.12                             | 0.12                         |
| 18     | 222                            | C6H6O9   | 4   | 1.5 | 1.0 | 5.4   | 3     | 0.12                             | 0.13                         |
| 19     | 238                            | C6H6O10  | 4   | 1.7 | 1.0 | 5.4   | 3     | 0.06                             | 0.08                         |
| 20     | 189                            | C6H7O6N1 | 4   | 1.0 | 1.2 | 5.4   | 3     | 0.10                             | 0.14                         |
| 21     | 205                            | C6H7O7N1 | 4   | 1.2 | 1.2 | 5.4   | 3     | 0.10                             | 0.07                         |
| 22     | 221                            | C6H7O8N1 | 4   | 1.3 | 1.2 | 5.4   | 3     | 0.07                             | 0.08                         |
| 23     | 237                            | C6H7O9N1 | 4   | 1.5 | 1.2 | 5.4   | 3     | 0.05                             | 0.11                         |
| 24     | 153                            | C7H7O3N1 | 5   | 0.4 | 1.0 | 6.3   | 3.5   | 0.11                             | 0.10                         |
| 25     | 169                            | C7H7O4N1 | 5   | 0.6 | 1.0 | 6.3   | 3.5   | 0.32                             | 0.31                         |
| 26     | 203                            | C7H9O6N1 | 4   | 0.9 | 1.3 | 6.3   | 3.5   | 0.10                             | 0.32                         |
| 27     | 219                            | C7H9O7N1 | 4   | 1.0 | 1.3 | 6.3   | 3.5   | 0.30                             | 0.07                         |
| 28     | 235                            | C7H9O8N1 | 4   | 1.1 | 1.3 | 6.3   | 3.5   | 0.00                             | 0.34                         |
| 29     | 184                            | C8H8O5   | 5   | 0.6 | 1.0 | 7.2   | 4     | 0.34                             | 0.15                         |
| 30     | 183                            | C8H9O4N1 | 5   | 0.5 | 1.1 | 7.2   | 4     | 0.11                             | 0.08                         |
| 31     | 262                            | C9H10O9  | 5   | 1.0 | 1.1 | 8.1   | 4.5   | 0.11                             | 0.00                         |

Table S4. Nitro aromatic compounds in gas phase detected at KIT Campus Nord, including chemical formula, concentration range, and average concentration (mean  $\pm$  standard deviation).

| Molecule                 | Formula                                                     | Concentration range (ng m <sup>-3</sup> ) | Average concentrations (ng m <sup>-3</sup> ) |
|--------------------------|-------------------------------------------------------------|-------------------------------------------|----------------------------------------------|
| 4-Nitrophenol            | C <sub>6</sub> H <sub>5</sub> O <sub>3</sub> N <sub>1</sub> | 0.01-2.8                                  | 0.3 $\pm$ 0.3                                |
| 4-Nitrocatechol          | C <sub>6</sub> H <sub>5</sub> O <sub>4</sub> N <sub>1</sub> | 0.01-6.4                                  | 1.2 $\pm$ 1.0                                |
| 2-Methyl-4-nitrophenol   | C <sub>7</sub> H <sub>7</sub> O <sub>3</sub> N <sub>1</sub> | 0.01-0.7                                  | 0.1 $\pm$ 0.1                                |
| 4-Methyl-5-nitrocatechol | C <sub>7</sub> H <sub>7</sub> O <sub>4</sub> N <sub>1</sub> | 0.01-2.0                                  | 0.3 $\pm$ 0.3                                |
| $\Sigma$ NACs            | -                                                           | 0.01-9.3                                  | 1.9 $\pm$ 1.5                                |

Table S5. Nitro aromatic compounds in particle phase detected at KIT Campus Nord, including chemical formula, mass absorption coefficient (MAC) at 365 nm, concentration range, and average concentration (mean  $\pm$  standard deviation).

| Molecule                 | Formula  | MAC ( $\text{m}^2 \text{g}^{-1}$ )* | Concentration range ( $\text{ng m}^{-3}$ ) | Average concentrations ( $\text{ng m}^{-3}$ ) |
|--------------------------|----------|-------------------------------------|--------------------------------------------|-----------------------------------------------|
| 4-Nitrophenol            | C6H5O3N1 | 2.44                                | 0.01-2.3                                   | 0.8 $\pm$ 0.5                                 |
| 4-Nitrocatechol          | C6H5O4N1 | 7.02                                | 0.3-78.9                                   | 10.8 $\pm$ 11.5                               |
| -                        | C6H5O5N1 | 14.00                               | 0.1-5.2                                    | 0.5 $\pm$ 0.6                                 |
| 2-Methyl-4-nitrophenol   | C7H7O3N1 | 3.15                                | 0.02-1.2                                   | 0.3 $\pm$ 0.2                                 |
| 4-Methyl-5-nitrocatechol | C7H7O4N1 | 12.90                               | 0.2-31.7                                   | 3.3 $\pm$ 4.0                                 |
| -                        | C7H7O5N1 | 14.00                               | 0.1-8.8                                    | 1.2 $\pm$ 1.3                                 |
| -                        | C8H9O5N1 | 14.00                               | 0.06-2.2                                   | 0.5 $\pm$ 0.4                                 |
| $\Sigma$ NACs            | -        |                                     | 1-130.2                                    | 17.5 $\pm$ 18.4                               |

\* (Xie et al. 2017).

Table S6. Gas to particle phase partitioning coefficients of those semi volatile potential brown carbon molecules which could be measured in both phases with sufficient sensitivity (average and standard deviation).

| Number | Formula  | Average g/p ratio | Std g/p ratio |
|--------|----------|-------------------|---------------|
| 1      | C3H5O6N1 | 0.81              | 0.67          |
| 2      | C4H4O2   | 9.7               | 10.1          |
| 3      | C4H5O6N1 | 2.1               | 1.8           |
| 4      | C4H5O7N1 | 1.8               | 1.8           |
| 5      | C5H5O8N1 | 0.8               | 0.5           |
| 6      | C5H6O4   | 0.2               | 0.4           |
| 7      | C5H7O6N1 | 3.2               | 4.4           |
| 8      | C5H7O7N1 | 0.3               | 0.3           |
| 9      | C6H6O5   | 0.1               | 0.1           |
| 10     | C6H6O10  | 1.3               | 0.9           |
| 11     | C6H7O6N1 | 0.4               | 0.3           |
| 12     | C6H7O7N1 | 0.6               | 0.6           |
| 13     | C6H7O8N1 | 0.8               | 0.4           |
| 14     | C6H5O3N1 | 0.5               | 2.1           |
| 15     | C6H5O4N1 | 0.1               | 0.1           |
| 16     | C7H7O3N1 | 0.7               | 0.4           |
| 17     | C7H7O4N1 | 0.3               | 0.2           |
| 18     | C7H9O6N1 | 0.4               | 0.3           |
| 19     | C7H9O7N1 | 0.5               | 0.6           |
| 20     | C7H9O8N1 | 0.4               | 0.4           |
| 21     | C8H8O5   | 0.5               | 0.3           |
| 22     | C8H9O4N1 | 0.3               | 0.2           |
| 23     | C9H10O9  | 0.6               | 0.4           |



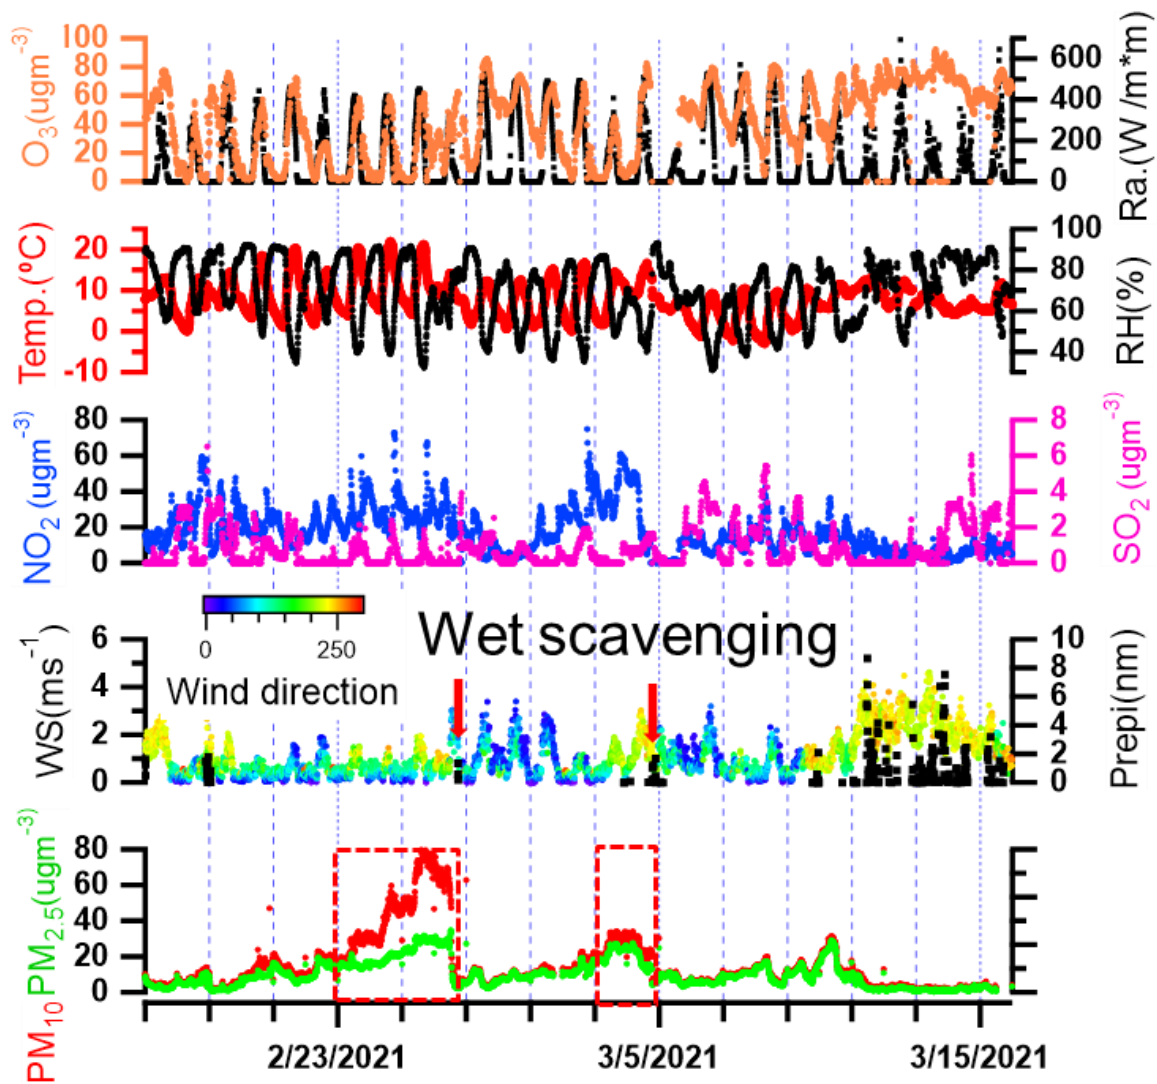

Figure S2 Overview of the meteorological parameters: trace gases ( $\text{NO}_2$ ,  $\text{O}_3$ , and  $\text{SO}_2$ ), temperature (T), radiation, relative humidity (RH), wind speed (WS), wind direction (WD), precipitation (Precipi), and  $\text{PM}_{2.5}$  and  $\text{PM}_{10}$  during the campaign. Red arrows indicate precipitation events leading to substantial removal of aerosol mass e.g. by wet scavenging at the end of periods with high pollution (dashed red boxes). Please note, that the first period was strongly influenced by Saharan dust (Cuevas-Agulló et al., 2023).

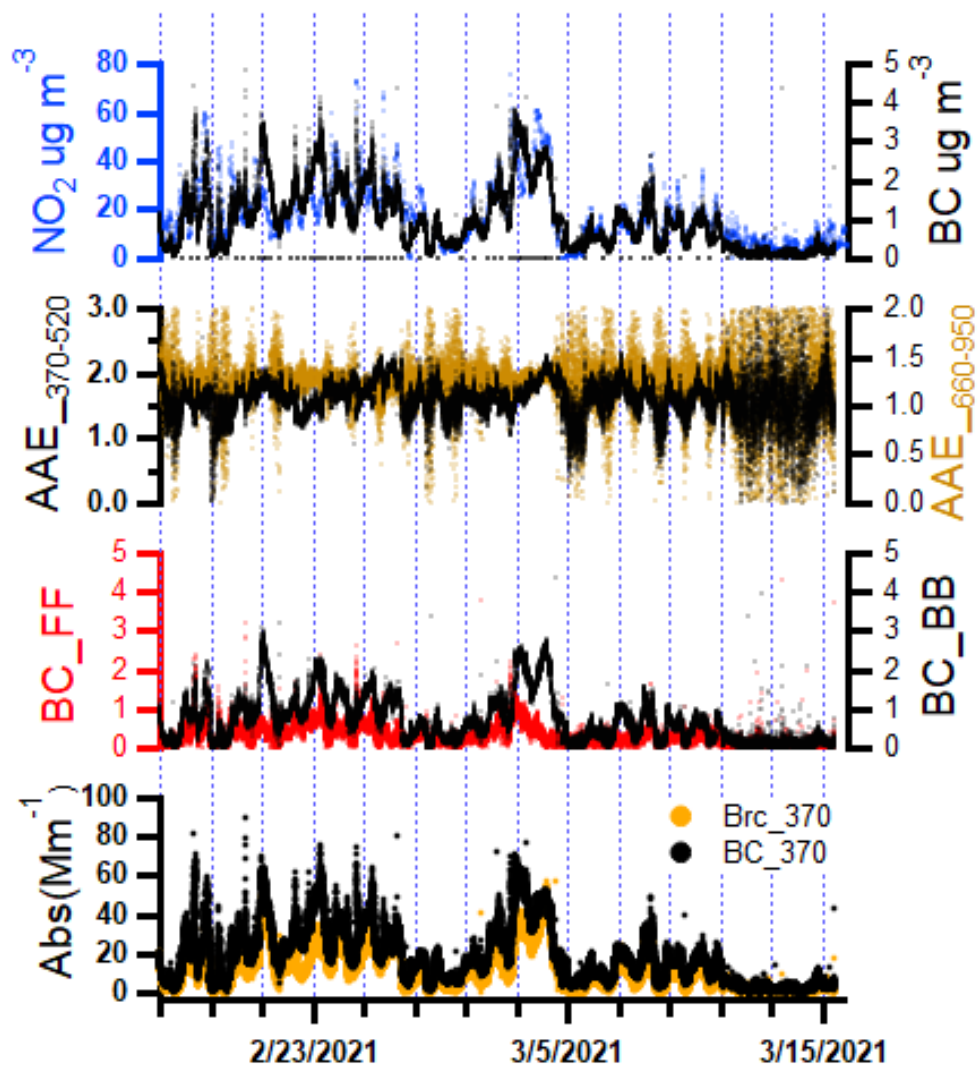

Figure S3. Overview of  $\text{NO}_2$  and black carbon (BC), absorption Ångström exponents (AAE) at 370 to 520 nm ( $\text{AAE}_{370-520}$ ), AAE at 660 to 950 ( $\text{AAE}_{660-950}$ ),  $\text{BC}_{\text{FF}}$ ,  $\text{BC}_{\text{BB}}$ ,  $\text{Abs}_{370}$  of BrC, and  $\text{Abs}_{370}$  of BC.



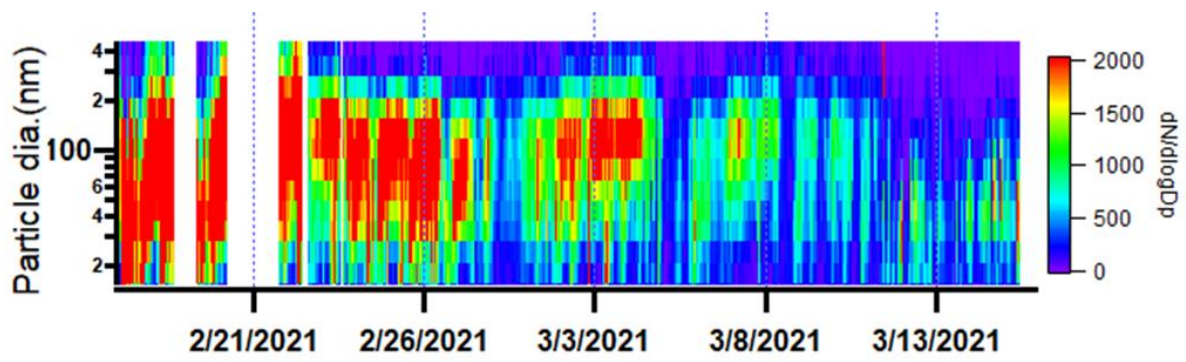

Figure S4. Particle size distributions measured with NanoScan between 10 and 410 nm.

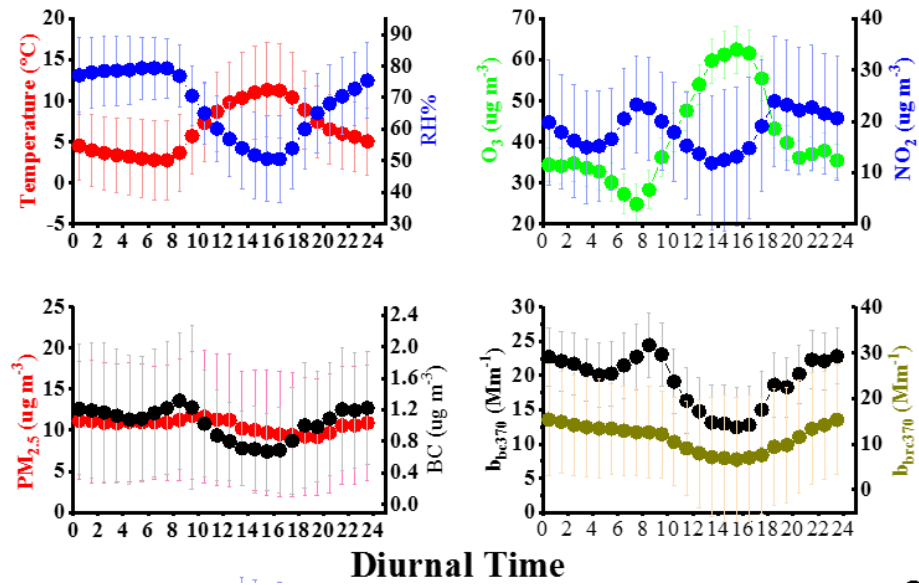

Figure S5. Diurnal variation of temperature, relative humidity, O<sub>3</sub>, NO<sub>2</sub>, PM<sub>2.5</sub>, BC, b<sub>bc370</sub> and b<sub>brc370</sub> for the whole measurement period.

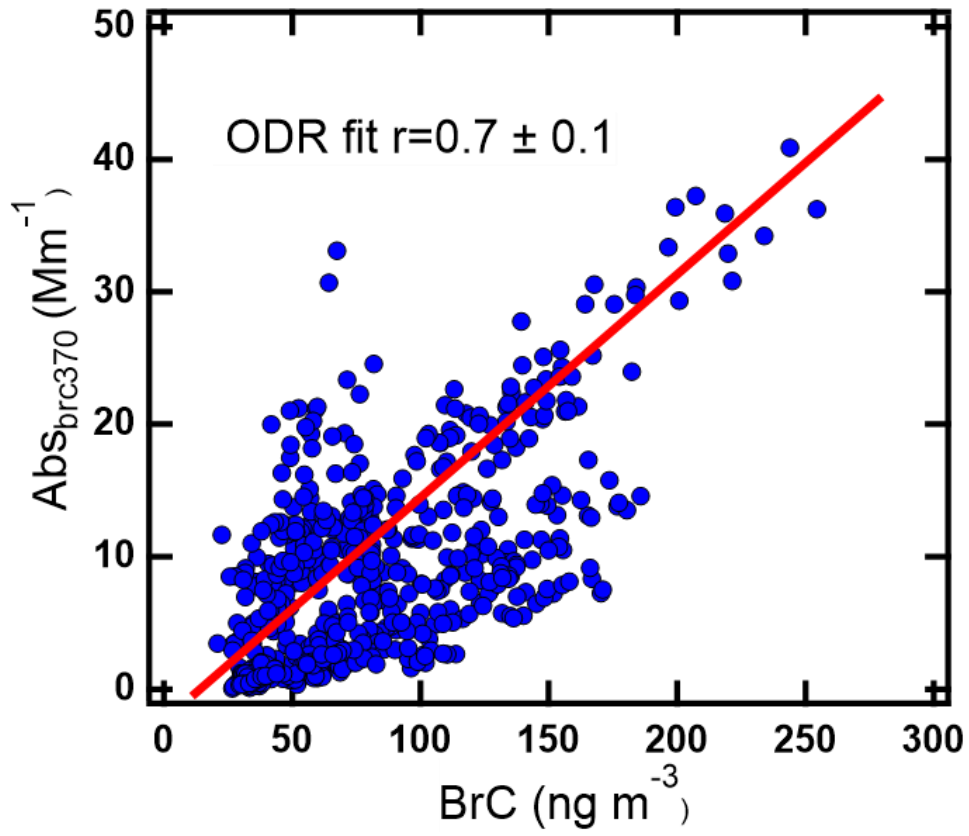

Figure S6. The correlation of 178 potential BrC mass (identified) and total BrC absorption ( $b_{\text{brc370}}$ ).

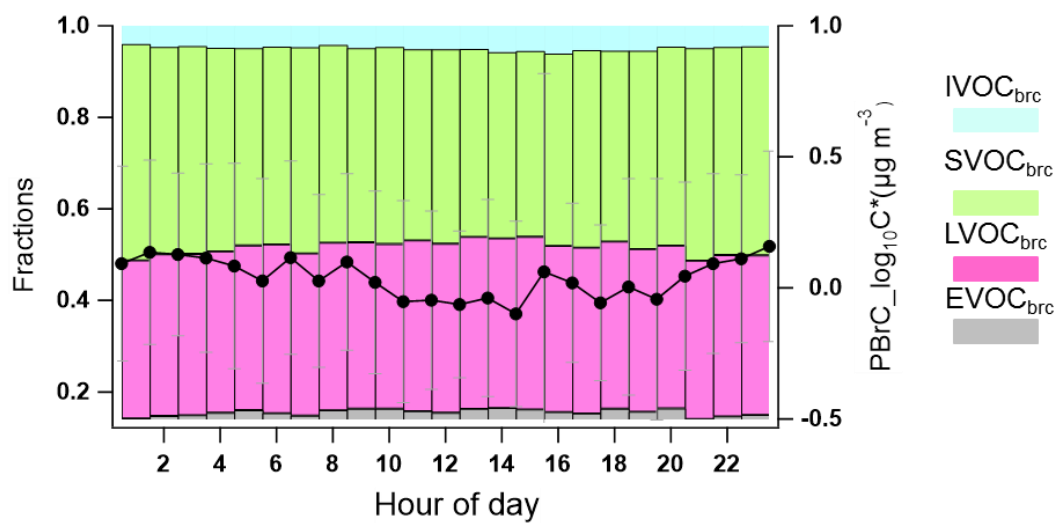

Figure S7. Diurnal profiles of LVOC<sub>brc</sub>, SVOC<sub>brc</sub>, IVOC<sub>brc</sub>, EVOC<sub>brc</sub>, and the average BrC volatility in the particle phase for the whole campaign (black circles).

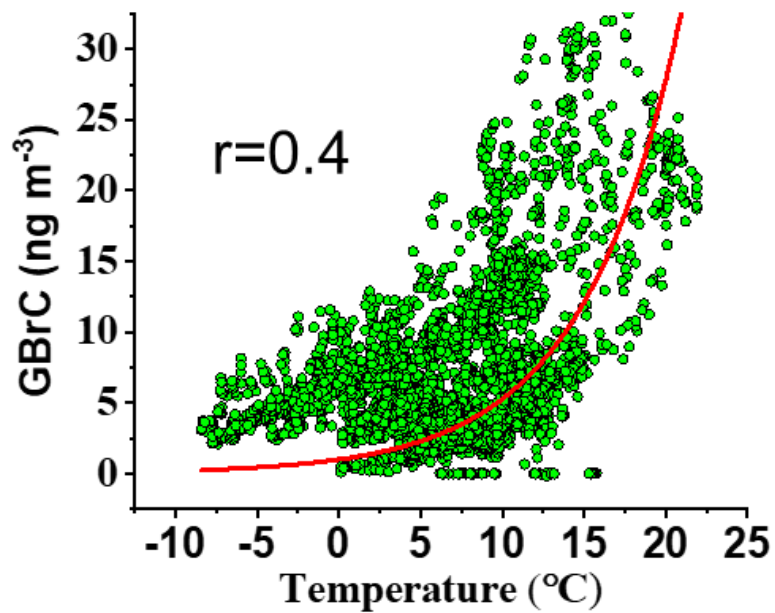

Figure S8. The correlation of gas-phase BrC and temperature based on exponential fit ( $y=e^{(-0.17*x)}$ )

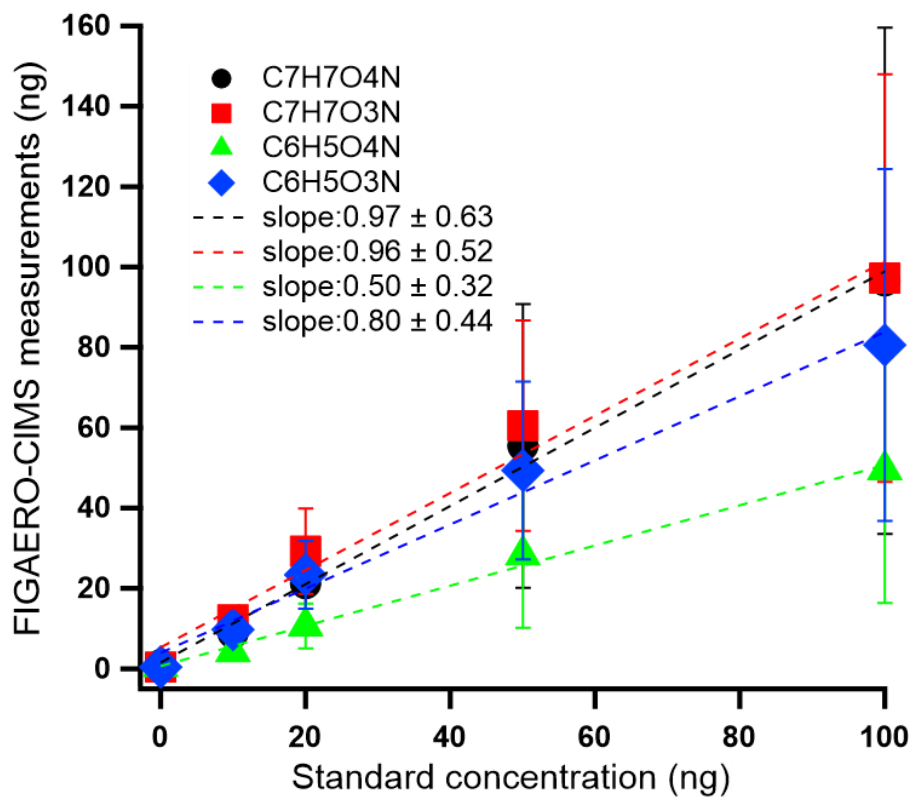

Figure S9. Calibration of FIGAERO-CIMS with four different nitro aromatic compounds. Blue: 4-nitrophenol; Green: 4-nitrocatechol; Red: 2-methyl-4-nitrophenol; Black: 4-methyl-5-nitrocatechol. The sensitivity of our iodide CIMS for 4-nitrophenol, 4-nitrocatechol, 2-methyl-4-nitrophenol, and 4-methyl-5-nitrocatechol were  $18 \pm 10$  cps ppt<sup>-1</sup>,  $11 \pm 7$  cps ppt<sup>-1</sup>,  $21 \pm 11$  cps ppt<sup>-1</sup>, and  $21 \pm 14$  cps ppt<sup>-1</sup>, respectively.

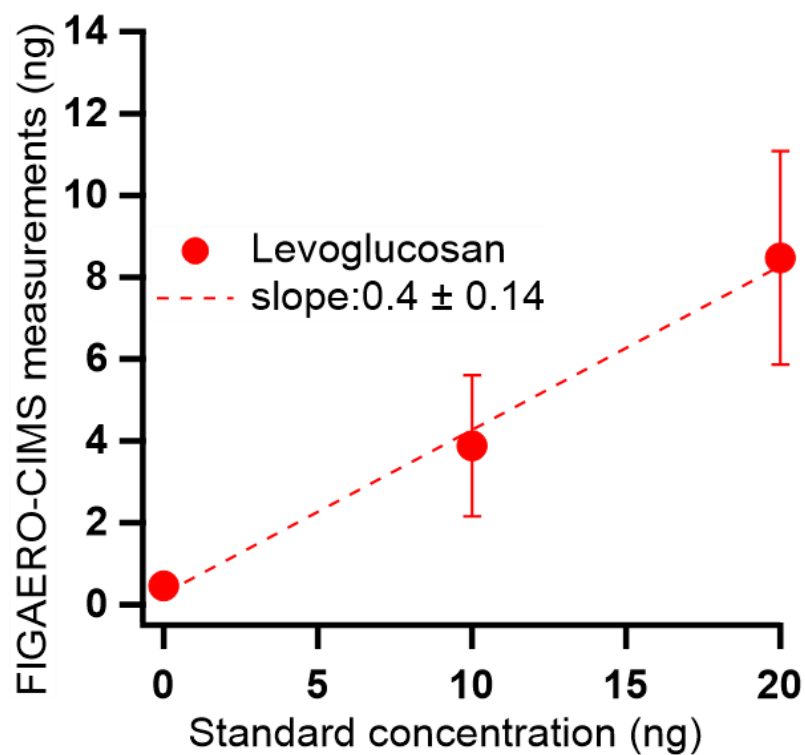

Figure S10. A calibration of FIGAERO-CIMS with levoglucosan. The measurement concentrations are calculated using a maximum sensitivity of 22 cps ppt<sup>-1</sup> (Salvador et al., 2021). The sensitivity of levoglucosan was determined  $9 \pm 3$  cps ppt<sup>-1</sup>.

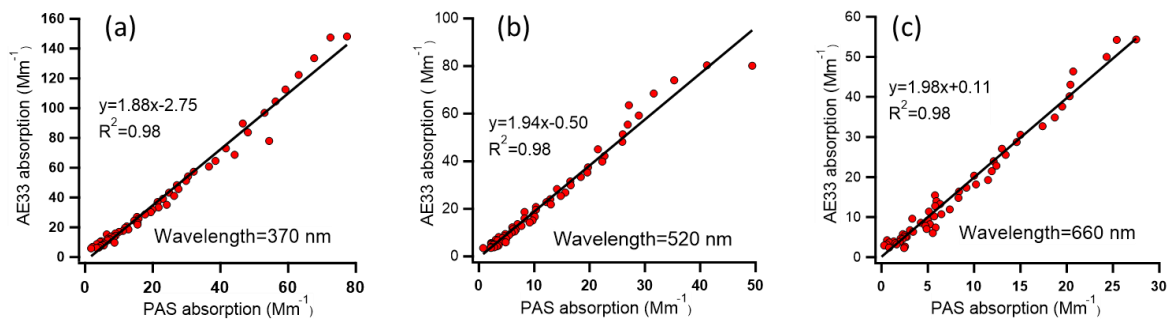

Fig. S11. Comparison of aerosol absorption coefficient measured by the photoacoustic spectrometer (PAS) and the aethalometer AE33 at 370 nm (a), (b), 520 nm, and 660 nm (c).



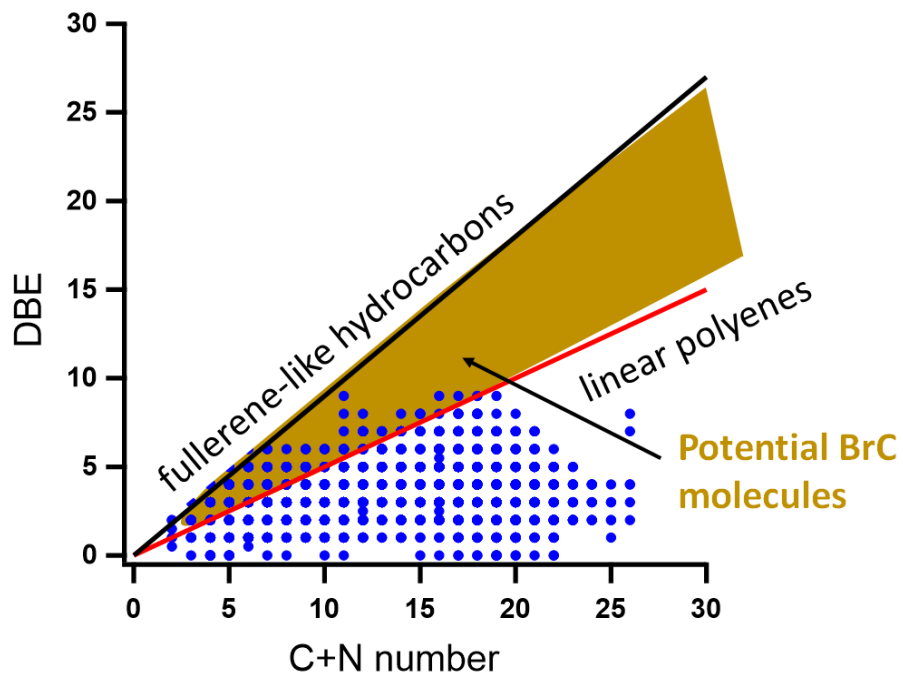

Figure S12. Plot of the double bond equivalent (DBE) vs numbers of carbon and nitrogen atoms according to our measurements following the procedure described by Lin et al., (2018). The lines indicate DBE reference values of linear conjugated polyenes (red solid line) and fullerene-like hydrocarbons with  $DBE=0.9 \times C$  (black solid line). Data points inside the yellow shaded area are potential BrC molecules. (cf. Lin et al., 2018).

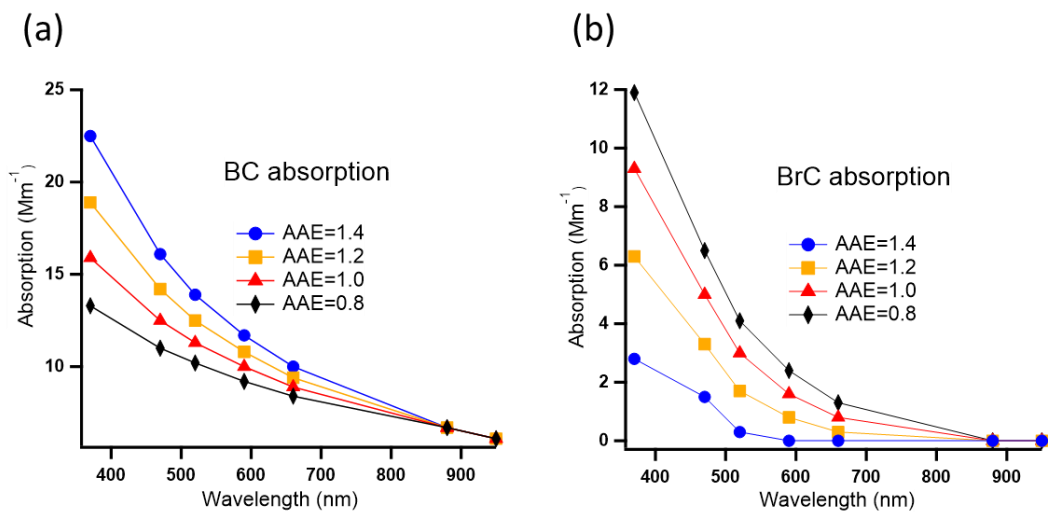

Figure S13. Light absorption of BC (a) and BrC (b) under different assumptions regarding the AAEB. The blue, yellow, red, and black markers represent light absorption of BC and BrC when AAEB is 1.4, 1.2, 1.0, and 0.8, respectively.

## Reference

Cuevas-Agulló, E., Barriopedro, D., García, R. D., Alonso-Pérez, S., González-Alemán, J. J., Werner, E., Suárez, D., Bustos, J. J., García-Castrillo, G., García, O., Barreto, Á., and Basart, S.: Sharp increase in Saharan dust intrusions over the western Euro-Mediterranean in February–March 2020–2022 and associated atmospheric circulation, *Atmos. Chem. Phys.*, 2023, 1-39, <https://doi.org/10.5194/acp-24-4083-2024>, 2024.

Lin, P., L. T. Fleming, S. A. Nizkorodov, J. Laskin, and A. Laskin.: Comprehensive Molecular Characterization of Atmospheric Brown Carbon by High Resolution Mass Spectrometry with Electrospray and Atmospheric Pressure Photoionization, *Anal. Chem.*, 90, 12493-502, <https://doi.org/10.1021/acs.analchem.8b02177>, 2018.

Salvador, C. M. G., R. Z. Tang, M. Priestley, L. J. Li, E. Tsiligiannis, M. Le Breton, W. F. Zhu, L. M. Zeng, H. Wang, Y. Yu, M. Hu, S. Guo, and M. Hallquist.: Ambient nitro-aromatic compounds - biomass burning versus secondary formation in rural China, *Atmos. Chem. Phys.*, 21, 1389-406, <https://doi.org/10.5194/acp-21-1389-2021>, 2021.

Xie, M., Chen, X., Hays, M. D., Lewandowski, M., Offenberg, J., Kleindienst, T. E., and Holder, A. L.: Light Absorption of Secondary Organic Aerosol: Composition and Contribution of Nitroaromatic Compounds, *Environ. Sci. Technol.*, 51, 11607– 11616, <https://doi.org/10.1021/acs.est.7b03263>, 2017.
